# Supplementary material for: Plastid genomes of the North American Rhus integrifolia-ovata complex and phylogenomic implications of inverted repeat structural evolution in Rhus L
Source: PeerJ. 2020 Jun 16;8:e9315. doi: 10.7717/peerj.9315 (PMC7304433; doi:10.7717/peerj.9315)
Supplement: Supplemental Information 2 [file peerj-08-9315-s002.xlsx]

## Sheet: Sheet1
Rhus ovata (AZ)							Rhus ovata (CA)							Rhus integrifolia
Length	Start position 1	Repeat type	Length	Start position 2	Hamming distance	e-value	Length	Start position 1	Repeat type	Length	Start position 2	Hamming distance	e-value	Length	Start position 1	Repeat type	Length	Start position 2	Hamming distance	e-value
78	95306	F	78	95324	-3	1.13e-31	78	95341	F	78	95359	-3	1.13e-31	78	95260	F	78	95278	-3	1.13e-31
66	95318	F	66	95336	-1	1.82e-28	66	95353	F	66	95371	-1	1.83e-28	66	95272	F	66	95290	-1	1.82e-28
64	95306	F	64	95342	-3	1.66e-23	60	54333	R	60	54333	0	3.78e-27	64	95260	F	64	95296	-3	1.66e-23
52	95332	F	52	95350	0	2.47e-22	54	54325	R	54	54325	0	1.55e-23	52	95286	F	52	95304	0	2.47e-22
48	30985	P	48	30985	0	6.33e-20	64	95341	F	64	95377	-3	1.66e-23	48	30963	P	48	30963	0	6.33e-20
52	77975	P	52	77975	-2	2.95e-18	52	95367	F	52	95385	0	2.48e-22	52	77934	P	52	77934	-2	2.95e-18
48	95318	F	48	95354	-1	9.12e-18	48	30985	P	48	30985	0	6.34e-20	48	95272	F	48	95308	-1	9.12e-18
41	41678	F	41	43902	0	1.04e-15	46	54325	F	46	54347	0	1.01e-18	41	41657	F	41	43881	0	1.04e-15
41	102746	F	41	125394	-1	1.28e-13	52	78011	P	52	78011	-2	2.95e-18	41	102700	F	41	125348	-1	1.28e-13
46	95306	F	46	95360	-3	4.15e-13	48	95353	F	48	95389	-1	9.13e-18	46	95260	F	46	95314	-3	4.15e-13
36	54335	R	36	54335	0	1.06e-12	41	41680	F	41	43904	0	1.04e-15	34	6077	P	34	6077	0	1.7e-11
34	6097	P	34	6097	0	1.7e-11	38	54355	R	38	54355	0	6.65e-14	34	95286	F	34	95322	0	1.7e-11
34	95332	F	34	95368	0	1.7e-11	41	102781	F	41	125439	-1	1.28e-13	32	49061	P	32	49061	0	2.72e-10
32	49086	P	32	49086	0	2.72e-10	46	95341	F	46	95395	-3	4.16e-13	39	46705	F	39	102702	-3	4.09e-09
39	46729	F	39	102748	-3	4.09e-09	34	6098	P	34	6098	0	1.7e-11	30	9542	P	30	47983	0	4.35e-09
30	9564	P	30	48008	0	4.35e-09	34	95367	F	34	95403	0	1.7e-11	28	33348	R	28	33348	0	6.96e-08
28	33369	R	28	33369	0	6.96e-08	32	49086	P	32	49086	0	2.72e-10	34	95272	F	34	95326	-2	8.58e-08
34	95318	F	34	95372	-2	8.58e-08	32	54325	R	32	54325	0	2.72e-10	33	46711	F	33	102708	-2	3.23e-07
33	46735	F	33	102754	-2	3.23e-07	39	46729	F	39	102783	-3	4.1e-09	33	46711	F	33	125356	-2	3.23e-07
33	46735	F	33	125402	-2	3.23e-07	30	9563	P	30	48008	0	4.36e-09	30	111790	F	30	111821	-1	3.92e-07
30	111836	F	30	111867	-1	3.92e-07	28	33371	R	28	33371	0	6.97e-08	26	14640	R	26	14640	0	1.11e-06
26	14662	R	26	14662	0	1.11e-06	34	95353	F	34	95407	-2	8.59e-08	26	50673	F	26	50699	0	1.11e-06
26	50699	F	26	50725	0	1.11e-06	33	46735	F	33	102789	-2	3.23e-07	32	32274	P	32	32274	-2	1.21e-06
32	32296	P	32	32296	-2	1.21e-06	33	46735	F	33	125447	-2	3.23e-07	32	46711	F	32	99613	-2	1.21e-06
32	46735	F	32	99659	-2	1.21e-06	30	111878	F	30	111909	-1	3.92e-07	24	80851	P	24	80851	0	1.78e-05
32	54326	R	32	54326	-2	1.21e-06	26	50698	F	26	50724	0	1.12e-06	27	133424	F	27	133451	-1	2.26e-05
24	478	F	24	501	0	1.78e-05	32	32297	P	32	32297	-2	1.22e-06	29	9540	F	29	38267	-2	6.36e-05
24	80892	P	24	80892	0	1.78e-05	32	46735	F	32	99694	-2	1.22e-06	26	11156	F	26	39400	-1	8.69e-05
27	133471	F	27	133498	-1	2.26e-05	24	478	F	24	501	0	1.78e-05	31	65131	P	31	128236	-3	0.000132
29	9562	F	29	38288	-2	6.36e-05	24	54325	F	24	54369	0	1.78e-05	28	69169	R	28	69169	-2	0.000237
26	11178	F	26	39421	-1	8.69e-05	24	80928	P	24	80928	0	1.78e-05	22	3866	F	22	3886	0	0.000285
22	3888	F	22	3908	0	0.000285	27	133515	F	27	133542	-1	2.26e-05	22	7025	P	22	7025	0	0.000285
22	7045	P	22	7045	0	0.000285	29	9561	F	29	38290	-2	6.37e-05	22	11209	P	22	11238	0	0.000285
22	11231	P	22	11260	0	0.000285	26	11177	F	26	39422	-1	8.7e-05	22	16272	R	22	16272	0	0.000285
22	16293	R	22	16293	0	0.000285	28	69245	R	28	69245	-2	0.000237	22	85621	P	22	85621	0	0.000285
22	85667	P	22	85667	0	0.000285	22	3888	F	22	3908	0	0.000285	22	120392	F	22	120414	0	0.000285
22	120437	F	22	120459	0	0.000285	22	7046	P	22	7046	0	0.000285	25	94711	F	25	94753	-1	0.000334
25	94757	F	25	94799	-1	0.000334	22	11230	P	22	11259	0	0.000285	27	99607	F	27	125350	-2	0.00088
27	99653	F	27	125396	-2	0.00088	22	16293	R	22	16293	0	0.000285	21	14642	R	21	14642	0	0.00114
21	14664	R	21	14664	0	0.00114	22	85702	P	22	85702	0	0.000285	21	14642	F	21	14643	0	0.00114
21	14664	F	21	14665	0	0.00114	22	120483	F	22	120505	0	0.000285	21	14643	R	21	14643	0	0.00114
21	14665	R	21	14665	0	0.00114	25	94792	F	25	94834	-1	0.000335	21	38275	P	21	47986	0	0.00114
21	38296	P	21	48011	0	0.00114	27	99688	F	27	125441	-2	0.000881	21	39619	F	21	70249	0	0.00114
21	39640	F	21	70287	0	0.00114	21	14663	R	21	14663	0	0.00114	21	63721	P	21	63750	0	0.00114
21	63774	P	21	63803	0	0.00114	21	38298	P	21	48011	0	0.00114	21	69151	F	21	69170	0	0.00114
21	73362	R	21	73362	0	0.00114	21	39642	F	21	70325	0	0.00114	21	73323	R	21	73323	0	0.00114
21	84417	R	21	84417	0	0.00114	21	63796	P	21	63825	0	0.00114	21	84371	R	21	84371	0	0.00114
24	54326	F	24	54348	-1	0.00128	21	69227	F	21	69246	0	0.00114	24	95260	F	24	95332	-1	0.00128
24	95306	F	24	95378	-1	0.00128	21	73399	R	21	73399	0	0.00114	29	11070	P	29	99599	-3	0.00172
29	11092	P	29	99645	-3	0.00172	21	84452	R	21	84452	0	0.00114	29	14536	P	29	14536	-3	0.00172
29	14558	P	29	14558	-3	0.00172	24	95341	F	24	95413	-1	0.00128	29	103100	R	29	103104	-3	0.00172
29	103146	R	29	103150	-3	0.00172	29	11091	P	29	99680	-3	0.00172	26	62331	P	26	62331	-2	0.00326
26	62384	P	26	62384	-2	0.00326	29	14557	P	29	14557	-3	0.00172	20	9365	R	20	9365	0	0.00456
26	69208	R	26	69208	-2	0.00326	29	103181	R	29	103185	-3	0.00172	20	14642	R	20	14642	0	0.00456
20	9385	R	20	9385	0	0.00456	26	14661	R	26	14661	-2	0.00326	20	14642	F	20	14644	0	0.00456
20	14664	R	20	14664	0	0.00456	26	62406	P	26	62406	-2	0.00326	20	14644	R	20	14644	0	0.00456
20	14664	F	20	14666	0	0.00456	20	9387	R	20	9387	0	0.00457	20	15040	F	20	91857	0	0.00456
20	14666	R	20	14666	0	0.00456	20	15061	F	20	91938	0	0.00457	20	16935	F	20	103101	0	0.00456
20	15062	F	20	91903	0	0.00456	20	16956	F	20	103182	0	0.00457	20	38343	P	20	47925	0	0.00456
20	16956	F	20	103147	0	0.00456	20	38366	P	20	47950	0	0.00457	20	49042	P	20	49076	0	0.00456
20	38364	P	20	47950	0	0.00456	20	49067	P	20	49101	0	0.00457	20	53594	R	20	53594	0	0.00456
20	49067	P	20	49101	0	0.00456	20	53444	R	20	53444	0	0.00457	20	88266	P	20	88266	0	0.00456
20	53445	R	20	53445	0	0.00456	20	53623	R	20	53623	0	0.00457	20	103621	F	20	103639	0	0.00456
20	53624	R	20	53624	0	0.00456	20	88347	P	20	88347	0	0.00457	23	51498	F	23	103101	-1	0.00492
20	88312	P	20	88312	0	0.00456	20	103702	F	20	103720	0	0.00457	28	9705	C	28	39208	-3	0.00616
20	103667	F	20	103685	0	0.00456	23	51523	F	23	103182	-1	0.00492
23	50016	C	23	77769	-1	0.00492	28	9726	C	28	39230	-3	0.00616
23	51524	F	23	103147	-1	0.00492
28	9727	C	28	39229	-3	0.00616
