# Supplementary material for: Plastid genomes of the North American Rhus integrifolia-ovata complex and phylogenomic implications of inverted repeat structural evolution in Rhus L
Source: PeerJ. 2020 Jun 16;8:e9315. doi: 10.7717/peerj.9315 (PMC7304433; doi:10.7717/peerj.9315)
Supplement: Supplemental Information 3 [file peerj-08-9315-s003.xlsx]

## Sheet: Sheet1
	region				region		sequence	product size	Tm(deg. C)
1	ndhC-trnV(uac)	rhus-	ndhCf	1	ndhC-trnV(uac)	rhus-ndhCf	AGCAGAAACATAGACGAACTCTCC	541	54.2
		rhus-	trnVr			rhus-trnVr	GTCTACGGTTCGAGTCCGTATAGC		60.4
2	trnH(gug)-psbA	rhus-	trnHf	2	trnH(gug)-psbA	rhus-trnHf	ATCCACTTGGCTACATCCGC	847	60.2
		rhus-	psbAr			rhus-psbAr	TTCTTCCTAGCTGCTTGGCC		60
3	trnF(gaa)-ndhJ	rhus-	trnFf	3	trnF(gaa)-ndhJ	rhus-trnFf	TCGGGATAGCTCAGCTGGTA	961	59.8
		rhus-	ndhGr			rhus-ndhGr	ATCATCCACGGCTGAAACGT		60
4	matK-trnK(uuu)	rhus-	matKf	4	matK-trnK(uuu)	rhus-matKf	CCCCATTTTCCAACGAAACCC	876	60
		rhus-	trnKr			rhus-trnKr	TCGTCCATACCATCGGGAGA		59.8
5	accD-psaI	rhus-	accDf	5	accD-psaI	rhus-accDf	CCTGAAGGTTCACAAGCGTC	945	59.1
		rhus-	psaIr			rhus-psaIr	AGAAGCCATTGCAATTGCCG		60.1
6	clpP intron 2	rhus-	clpPi2f	6	clpP intron 2	rhus-clpPi2f	AGGGCTTGCCTGTTCTTTGT	938	60.1
		rhus-	clpPi2r			rhus-clpPi2r	ATAAACTCTCCTGGCGGCTG		59.8
7	psaA-ycf3	rhus-	psaAf	7	psaA-ycf3	rhus-psaAf	GTCTGGCCCATTCCTCGAAA	888	60
		rhus-	ycf3r			rhus-ycf3r	AAGCCGCCGAGTATTGGAAA		60
8	trnE(uuc)-trnT(ggu)	rhus-	trnEf	8	trnE(uuc)-trnT(ggu)	rhus-trnEf	CGTAGTACCCTACCCCCAGG	829	60.5
		rhus-	trnTr			rhus-trnTr	GGTTAGTGGCCAAATCGGGA		60
